# Supplementary material
Source: Springer Nature journal article supplement (https://www.springermedizin.de/resource/supplementary/12968_2012_3287_MOESM1_ESM.pdf/9583552)

**BASE**

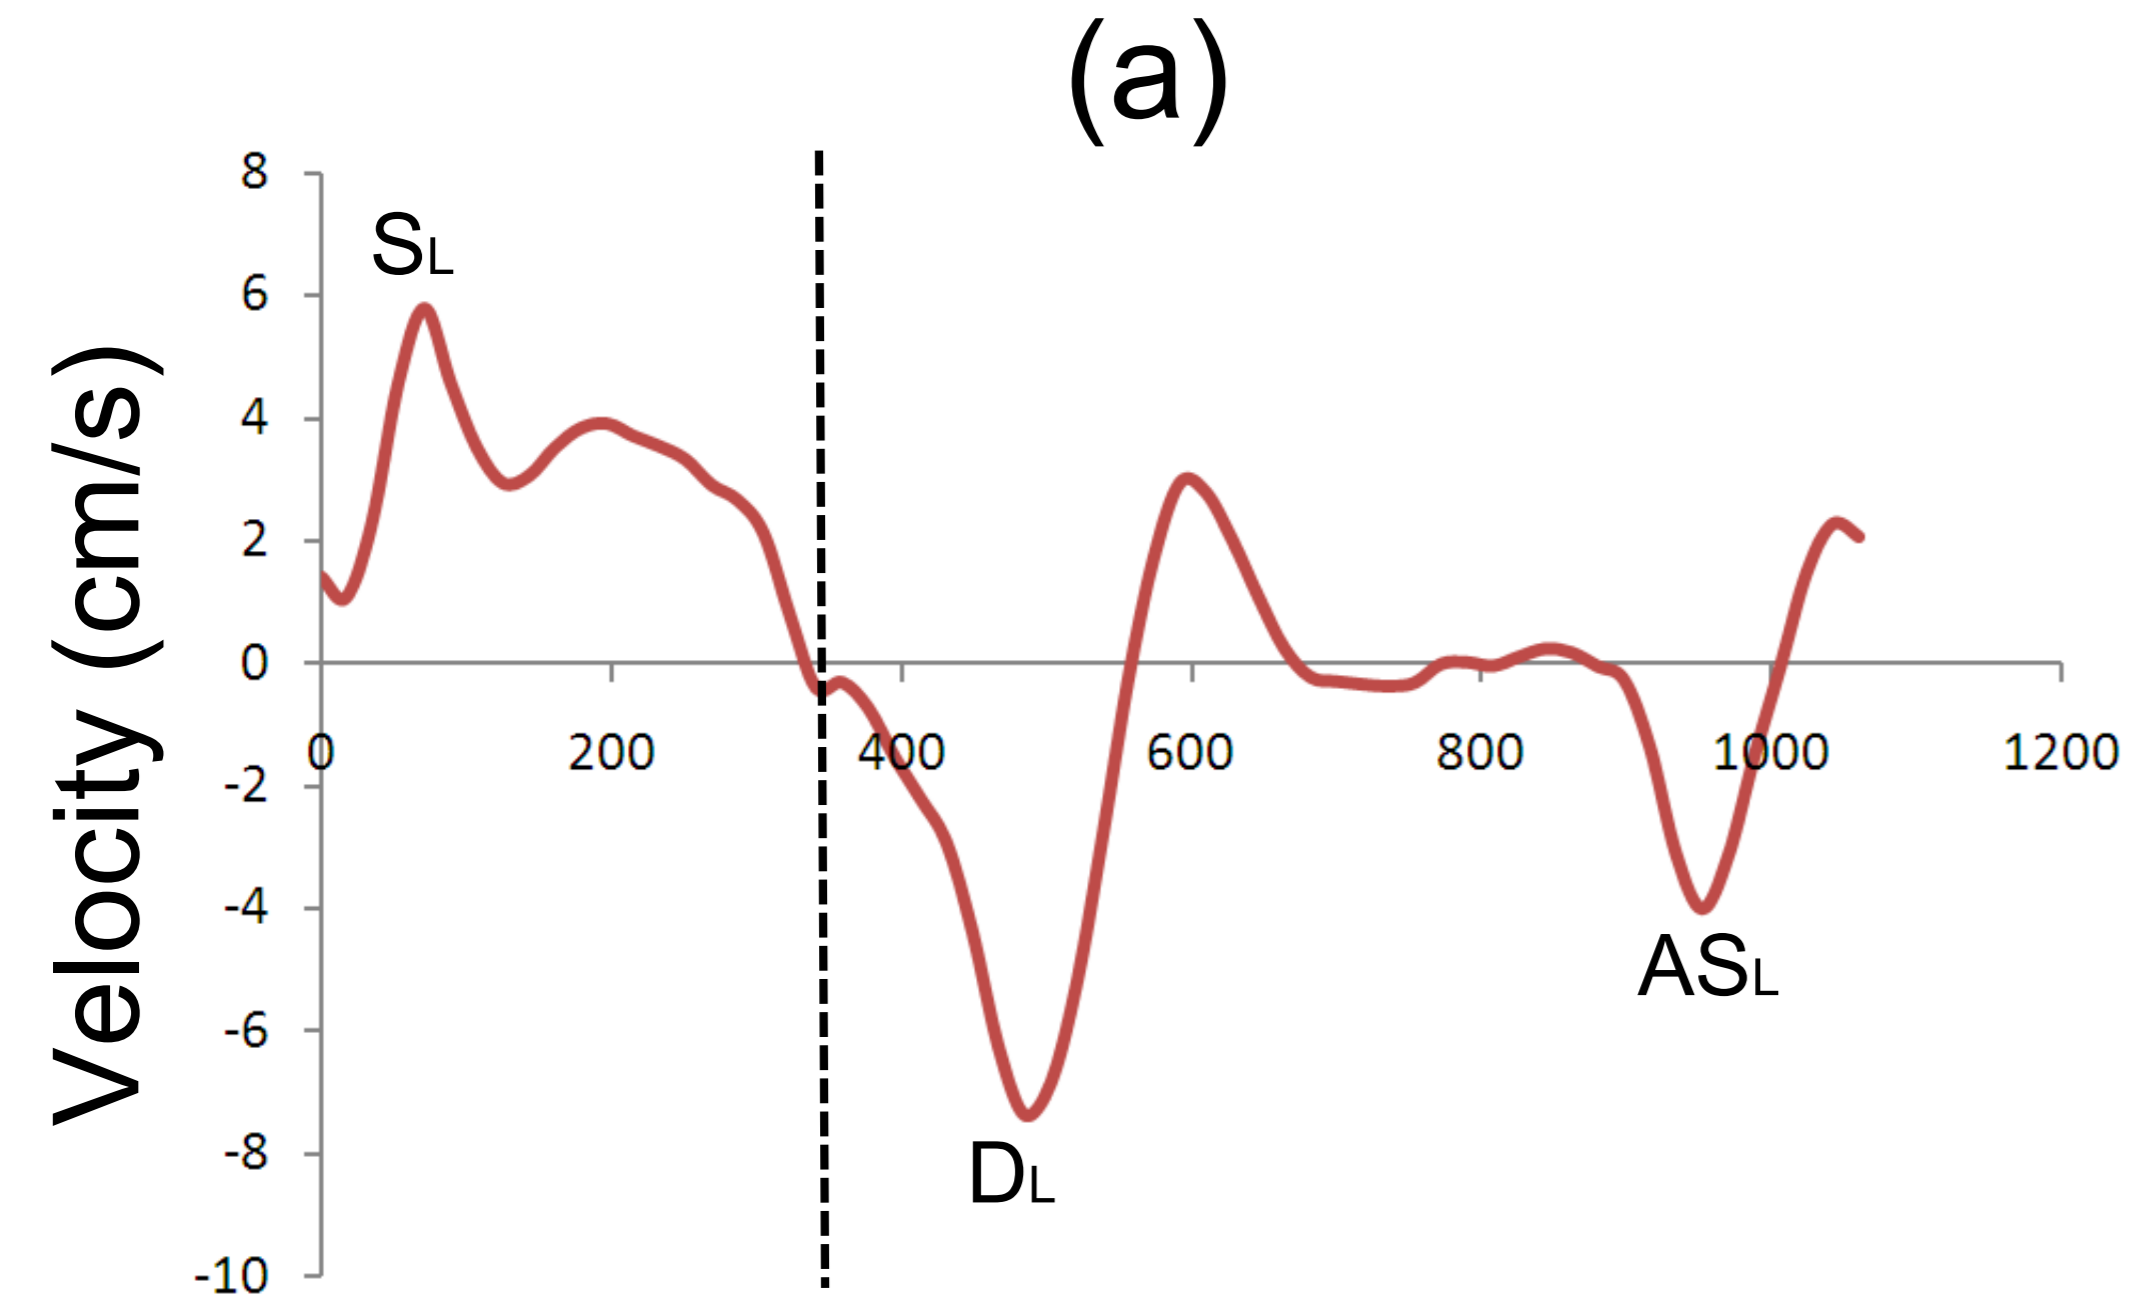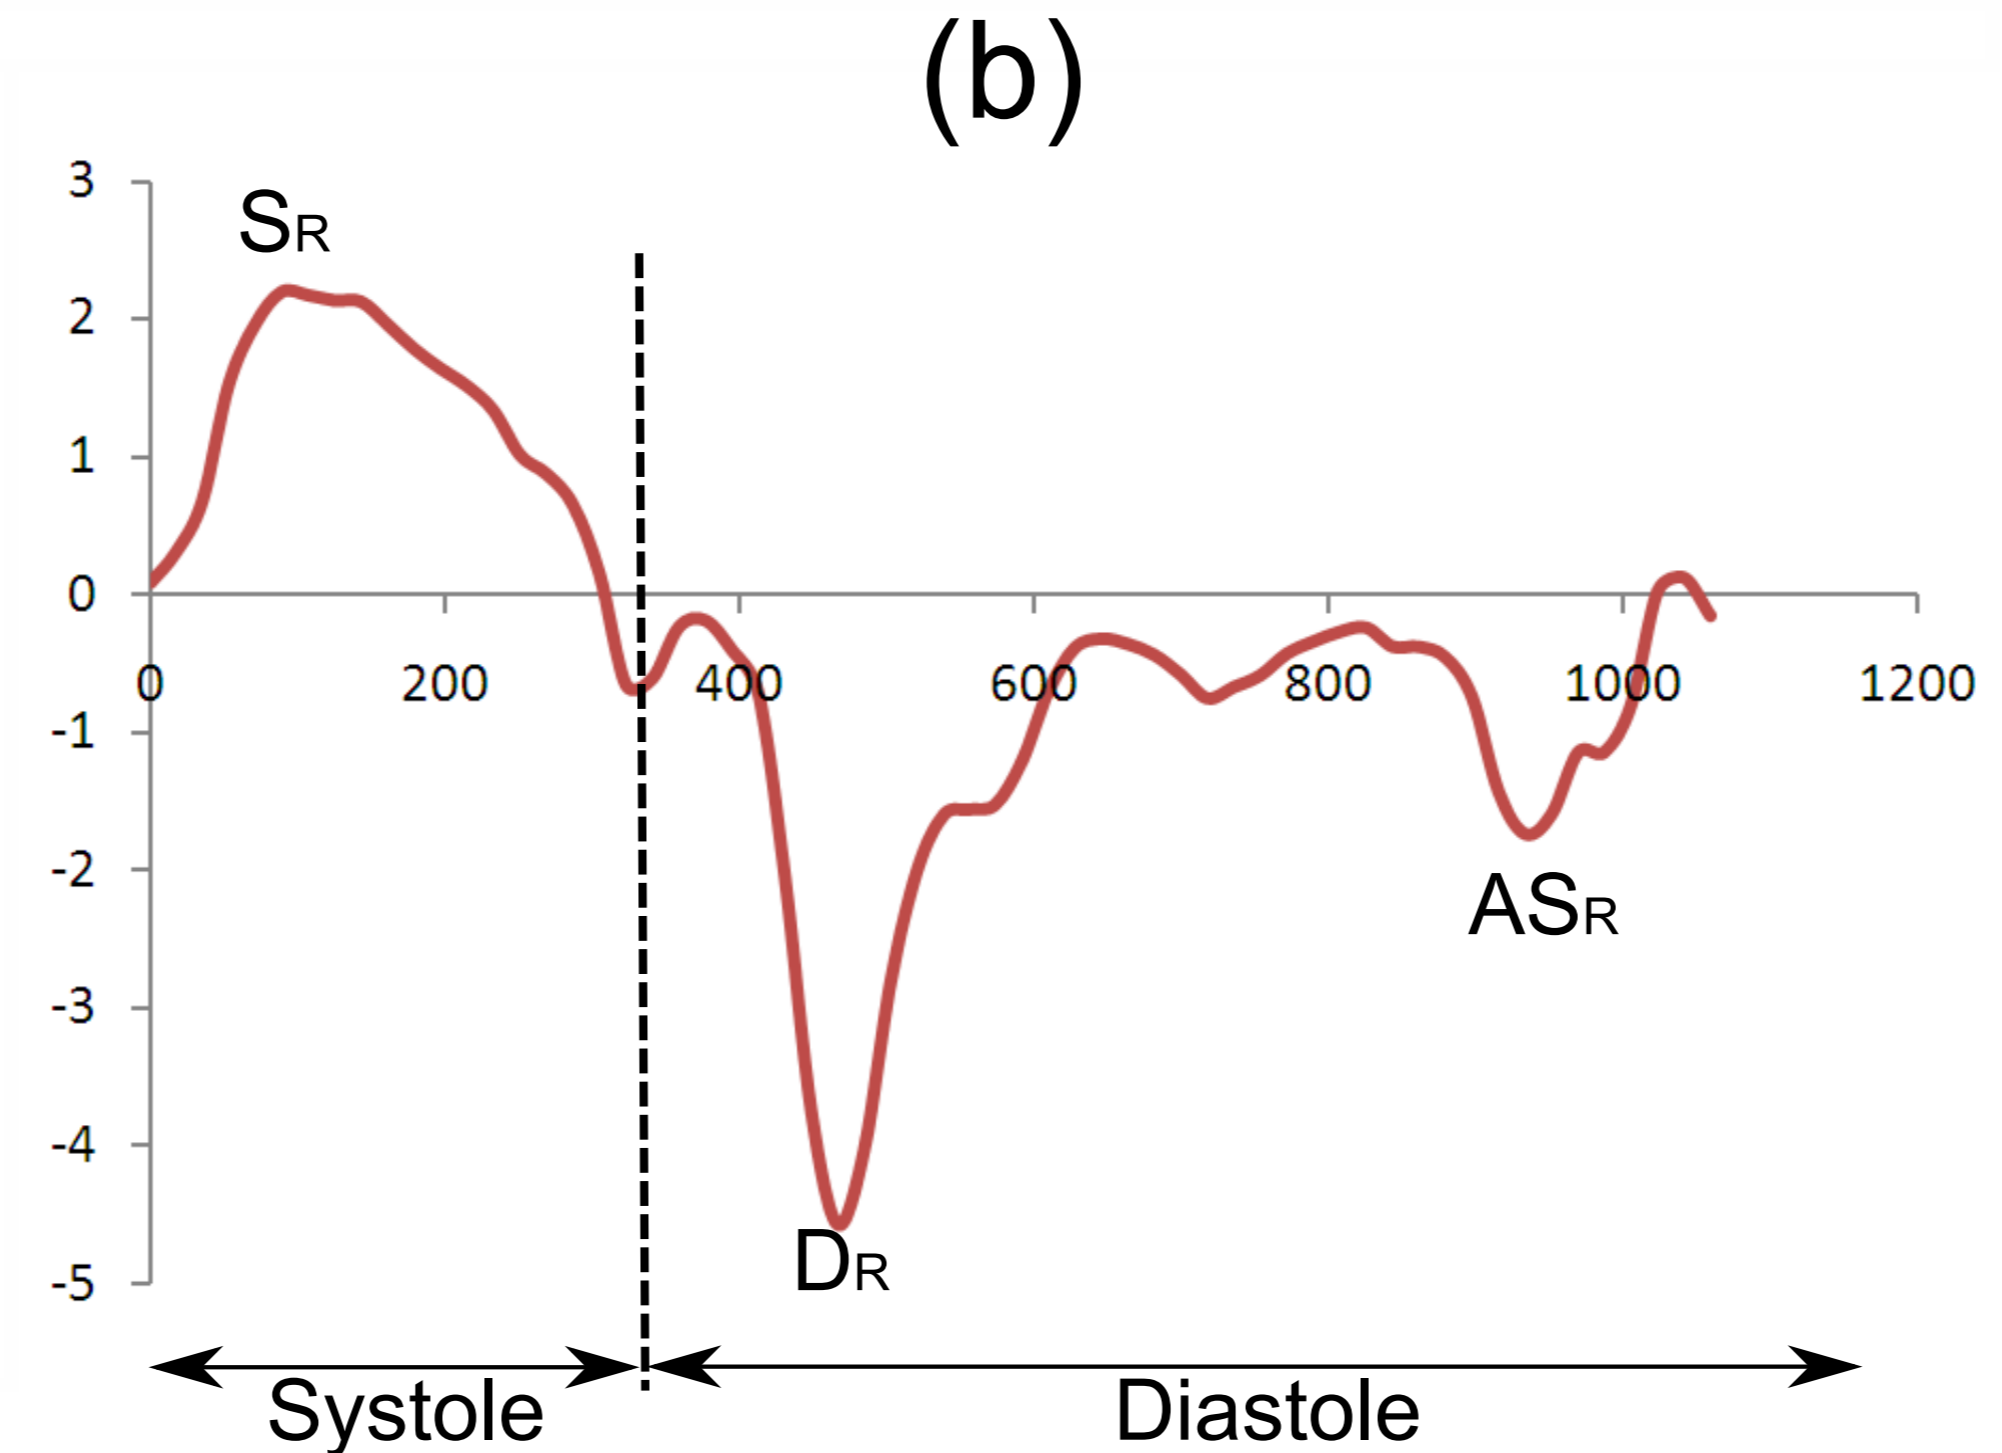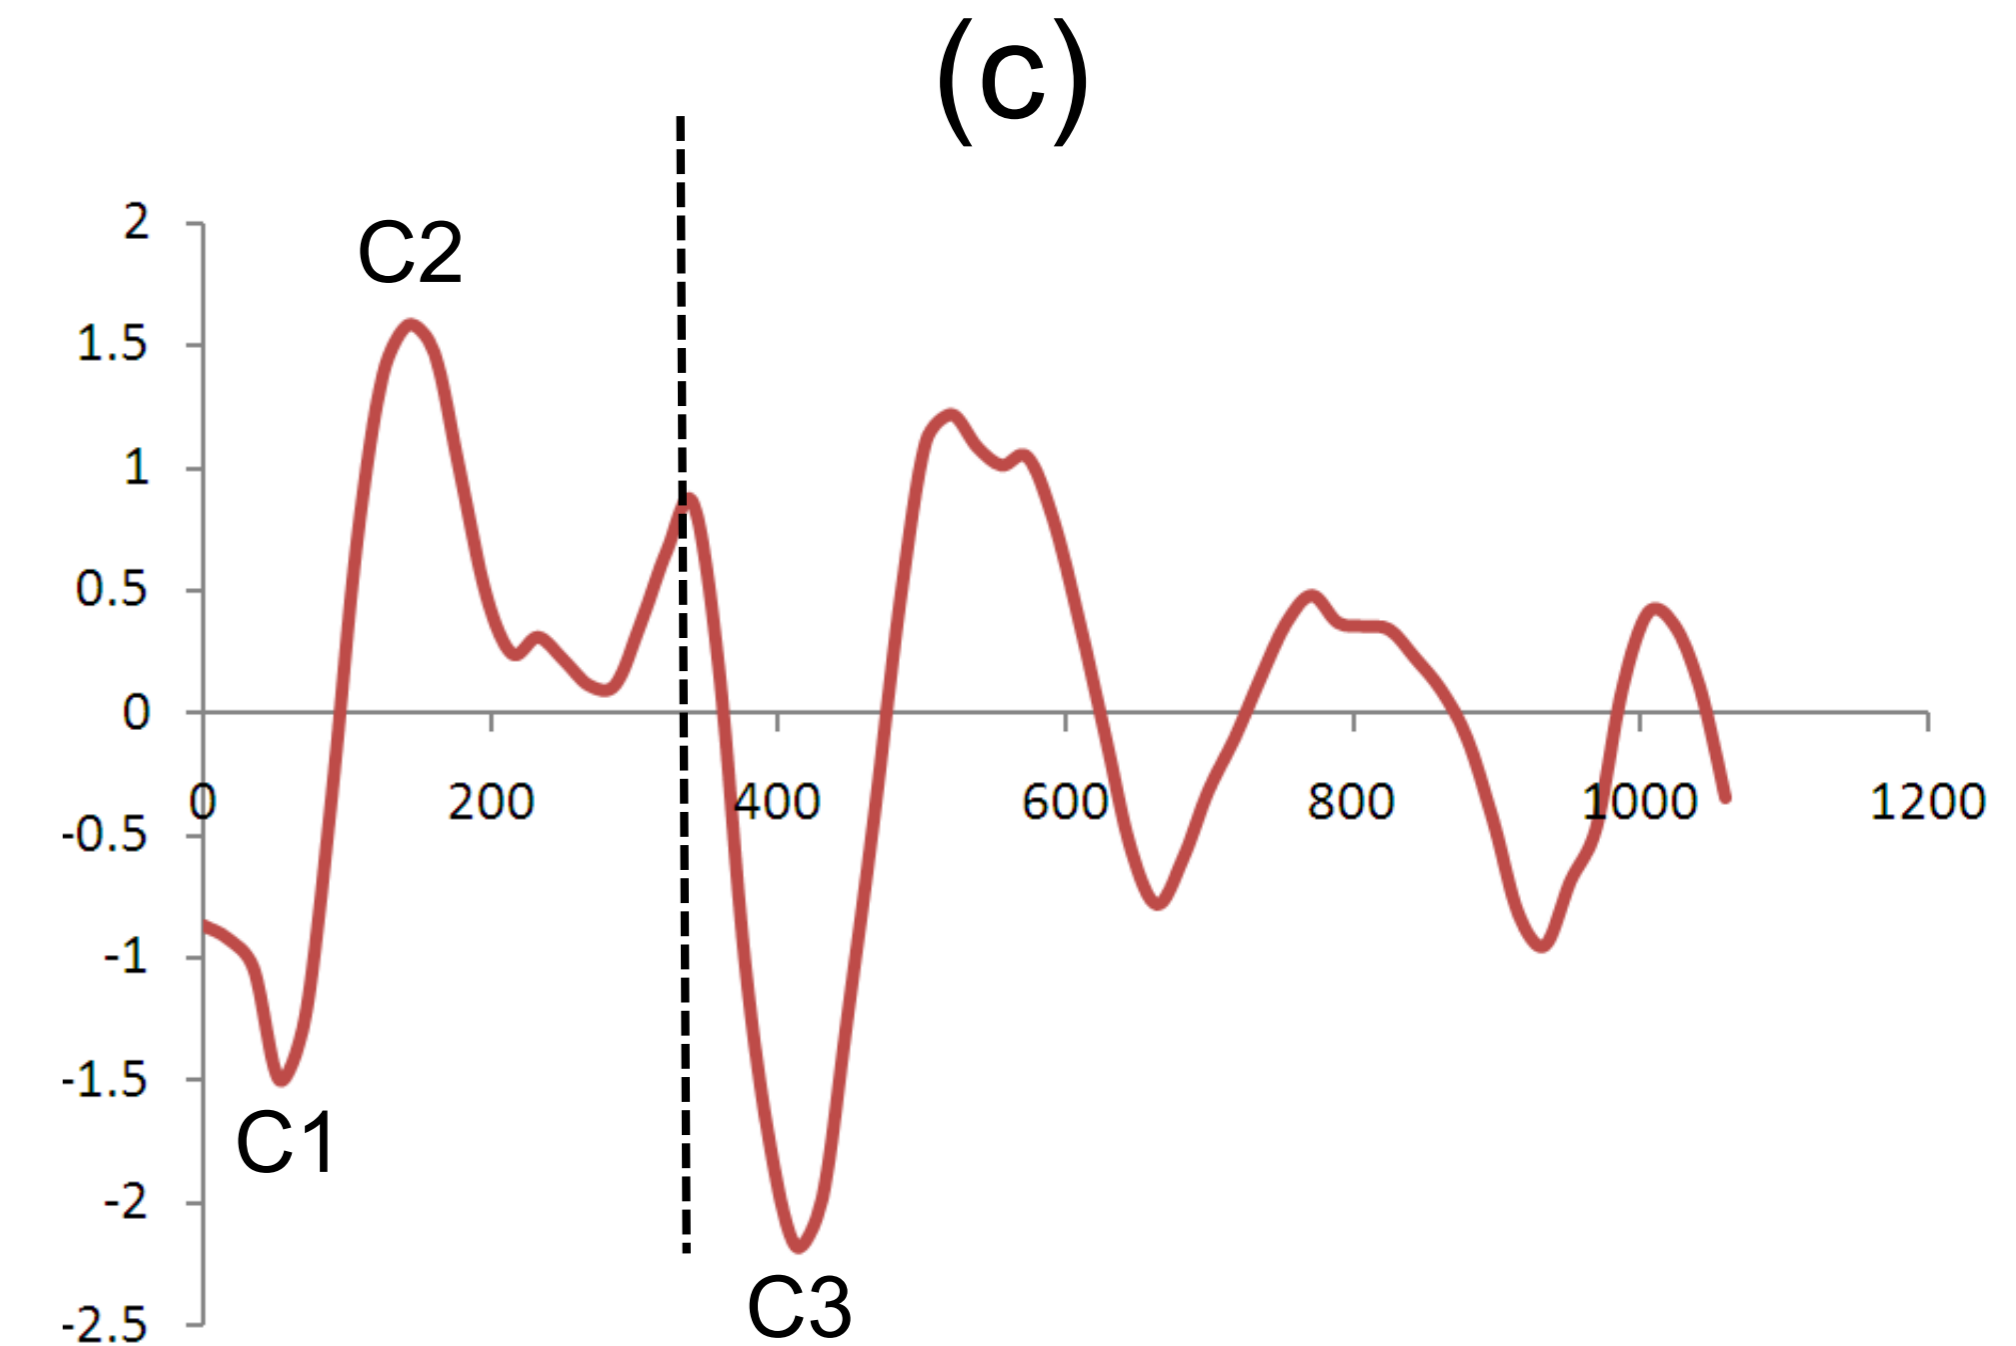

**MID**

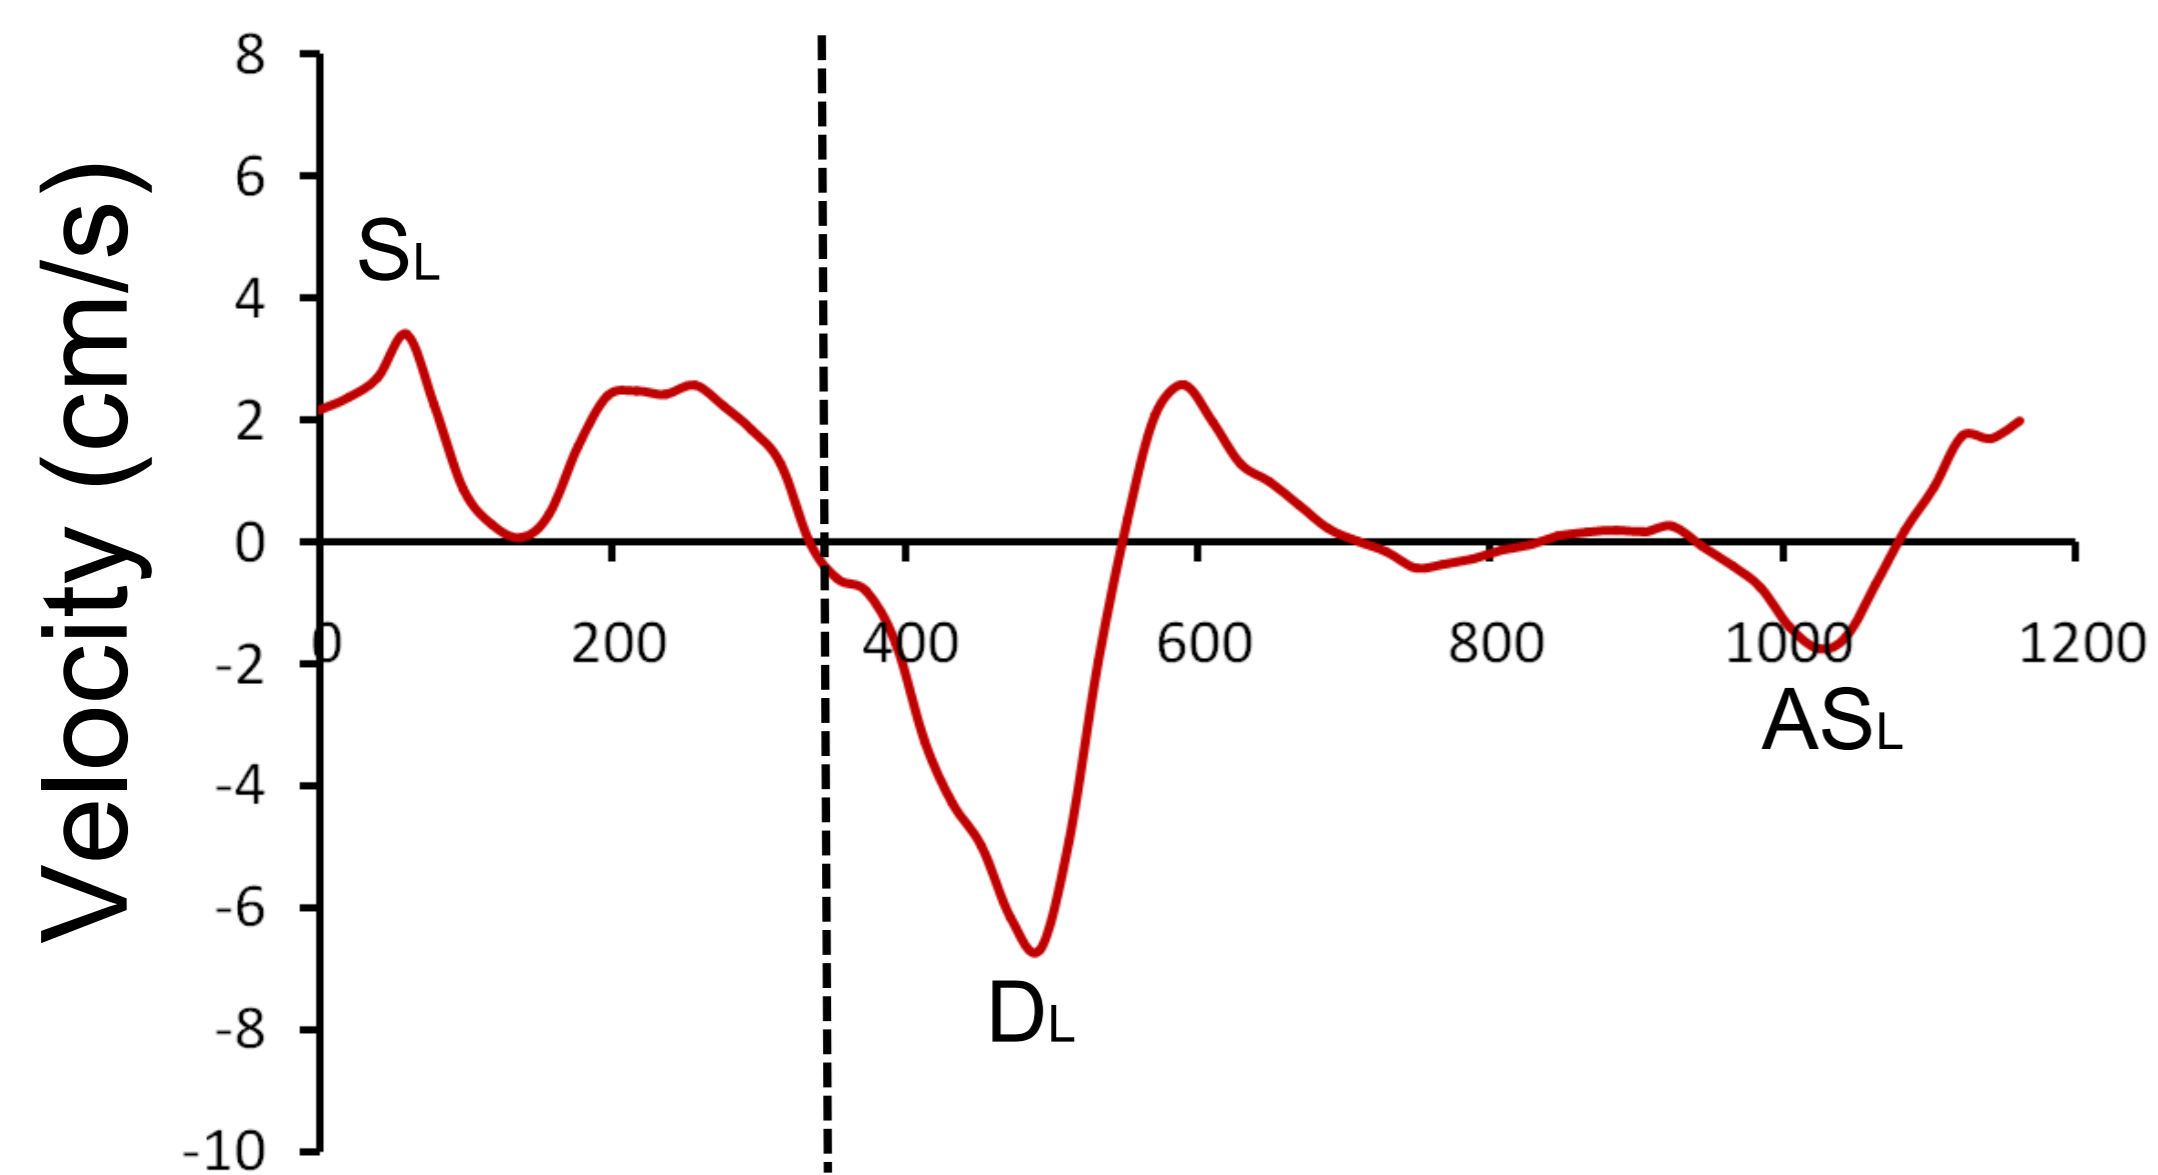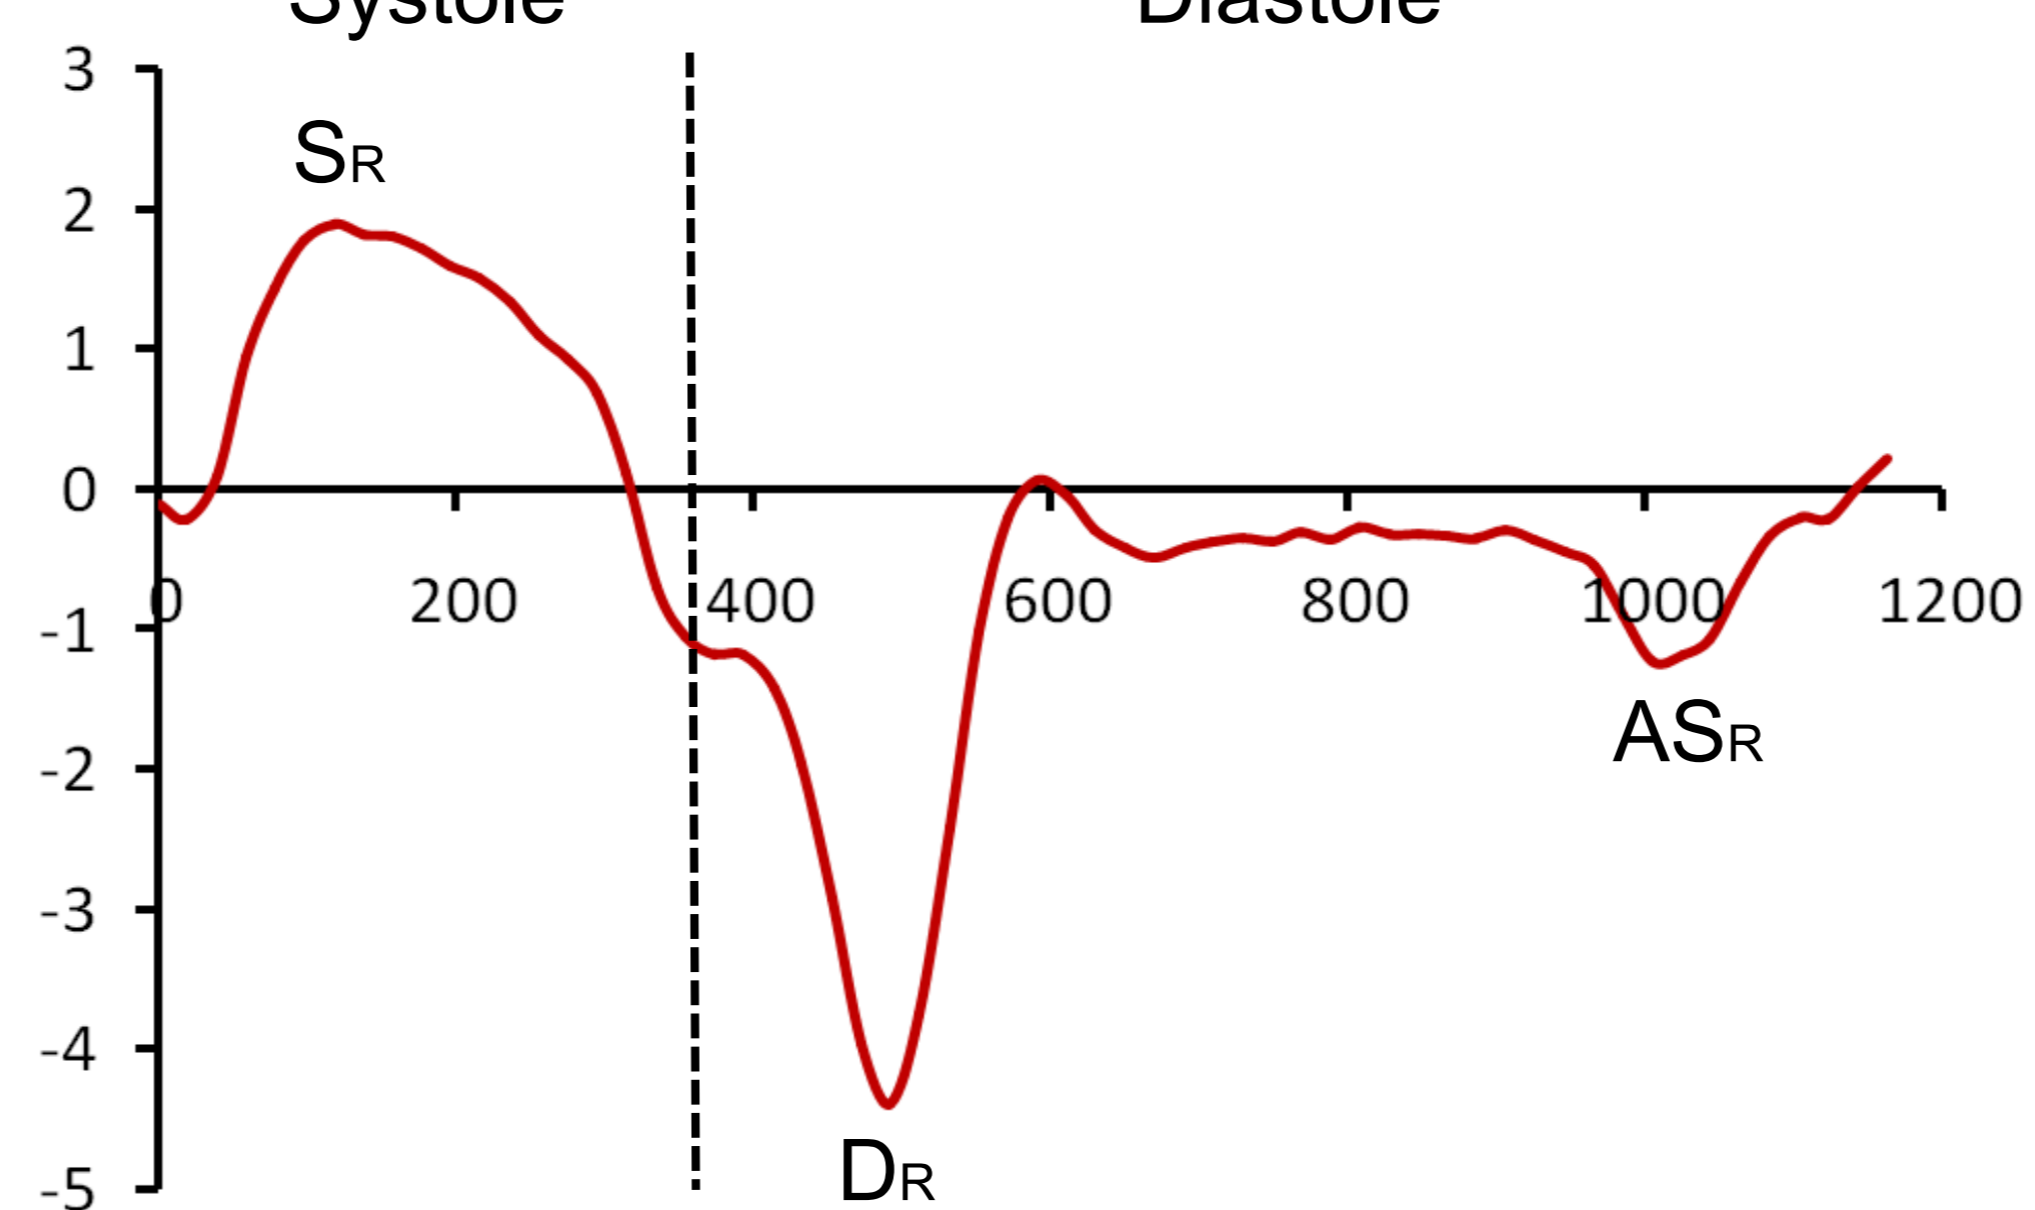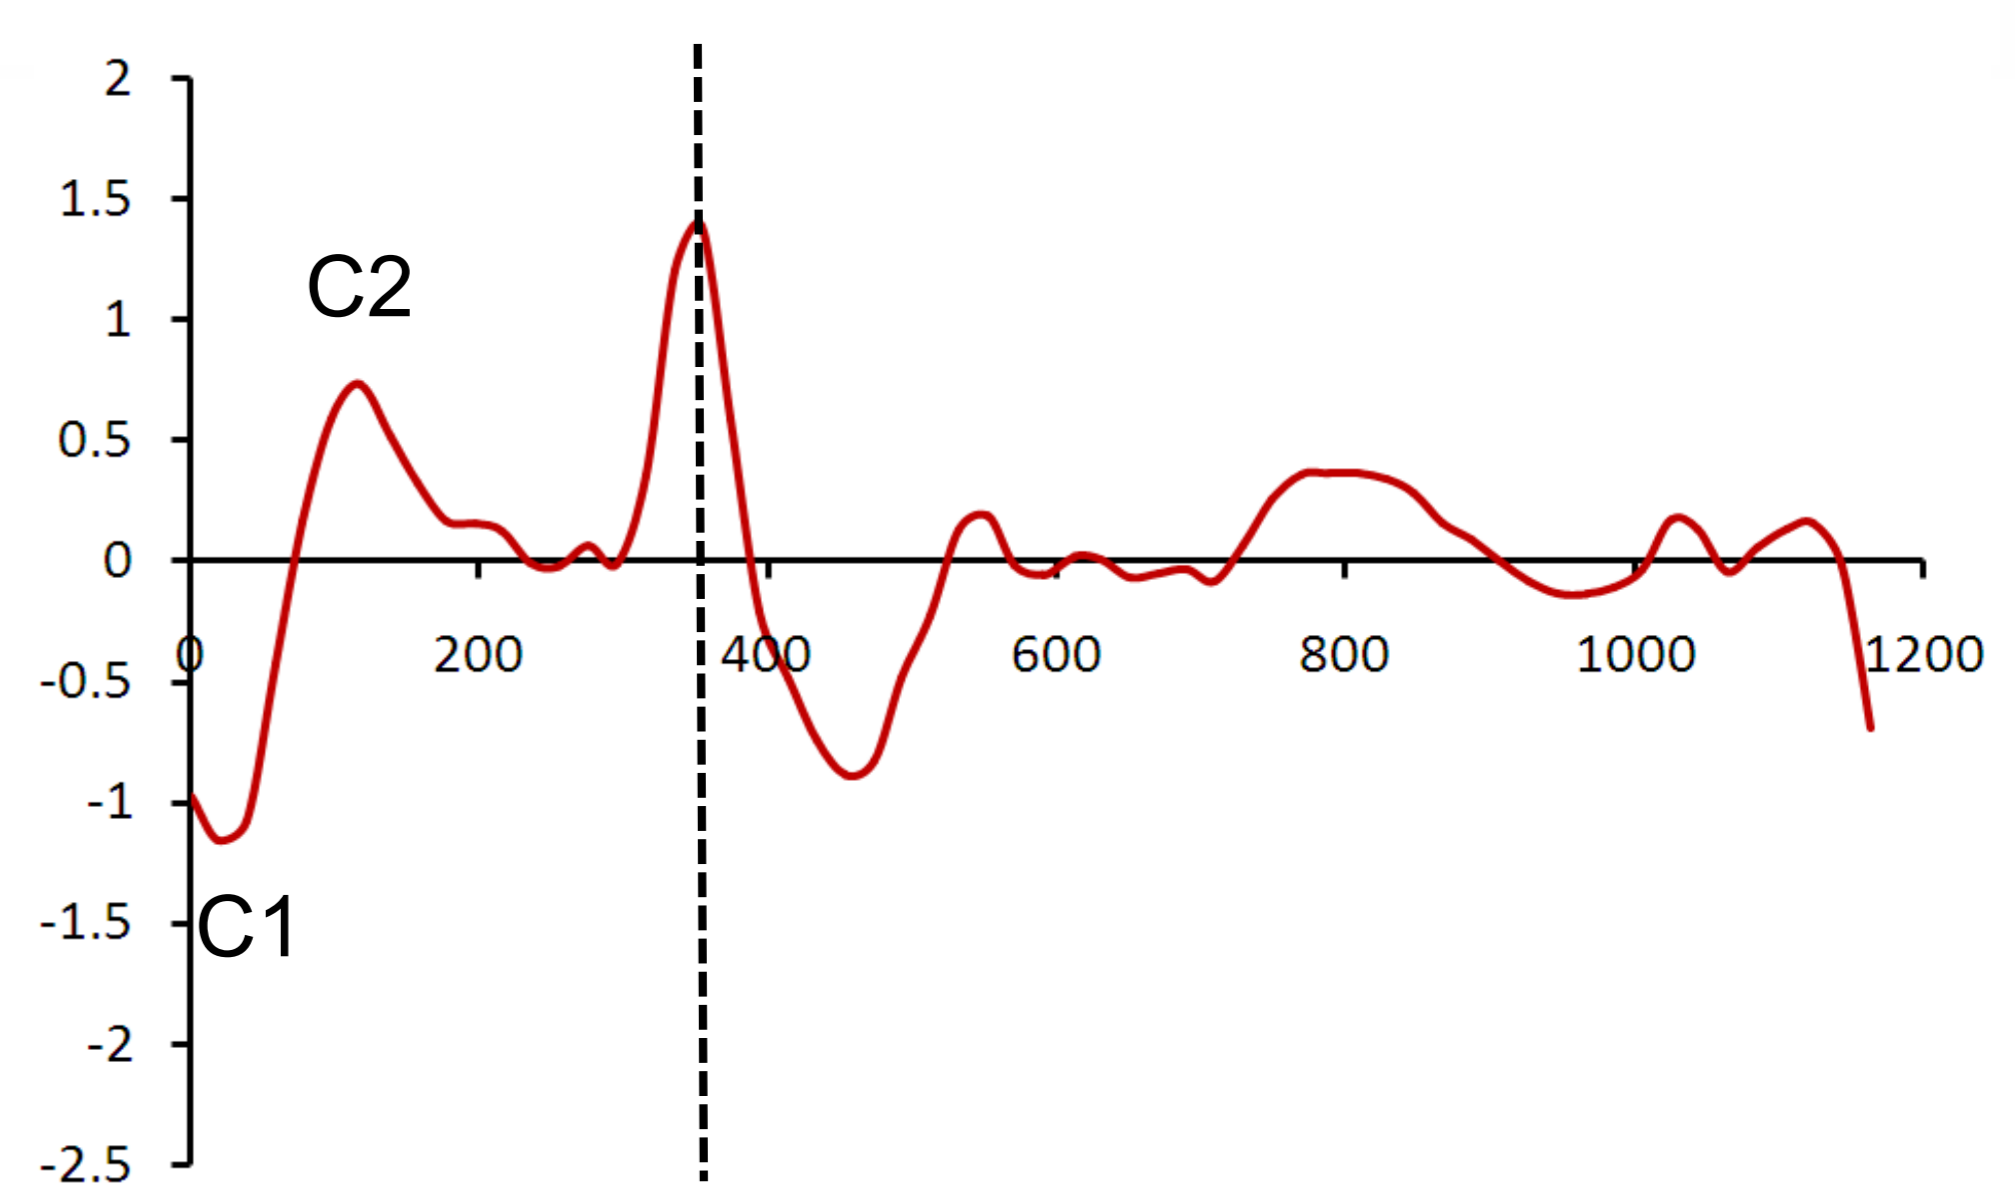

**APEX**

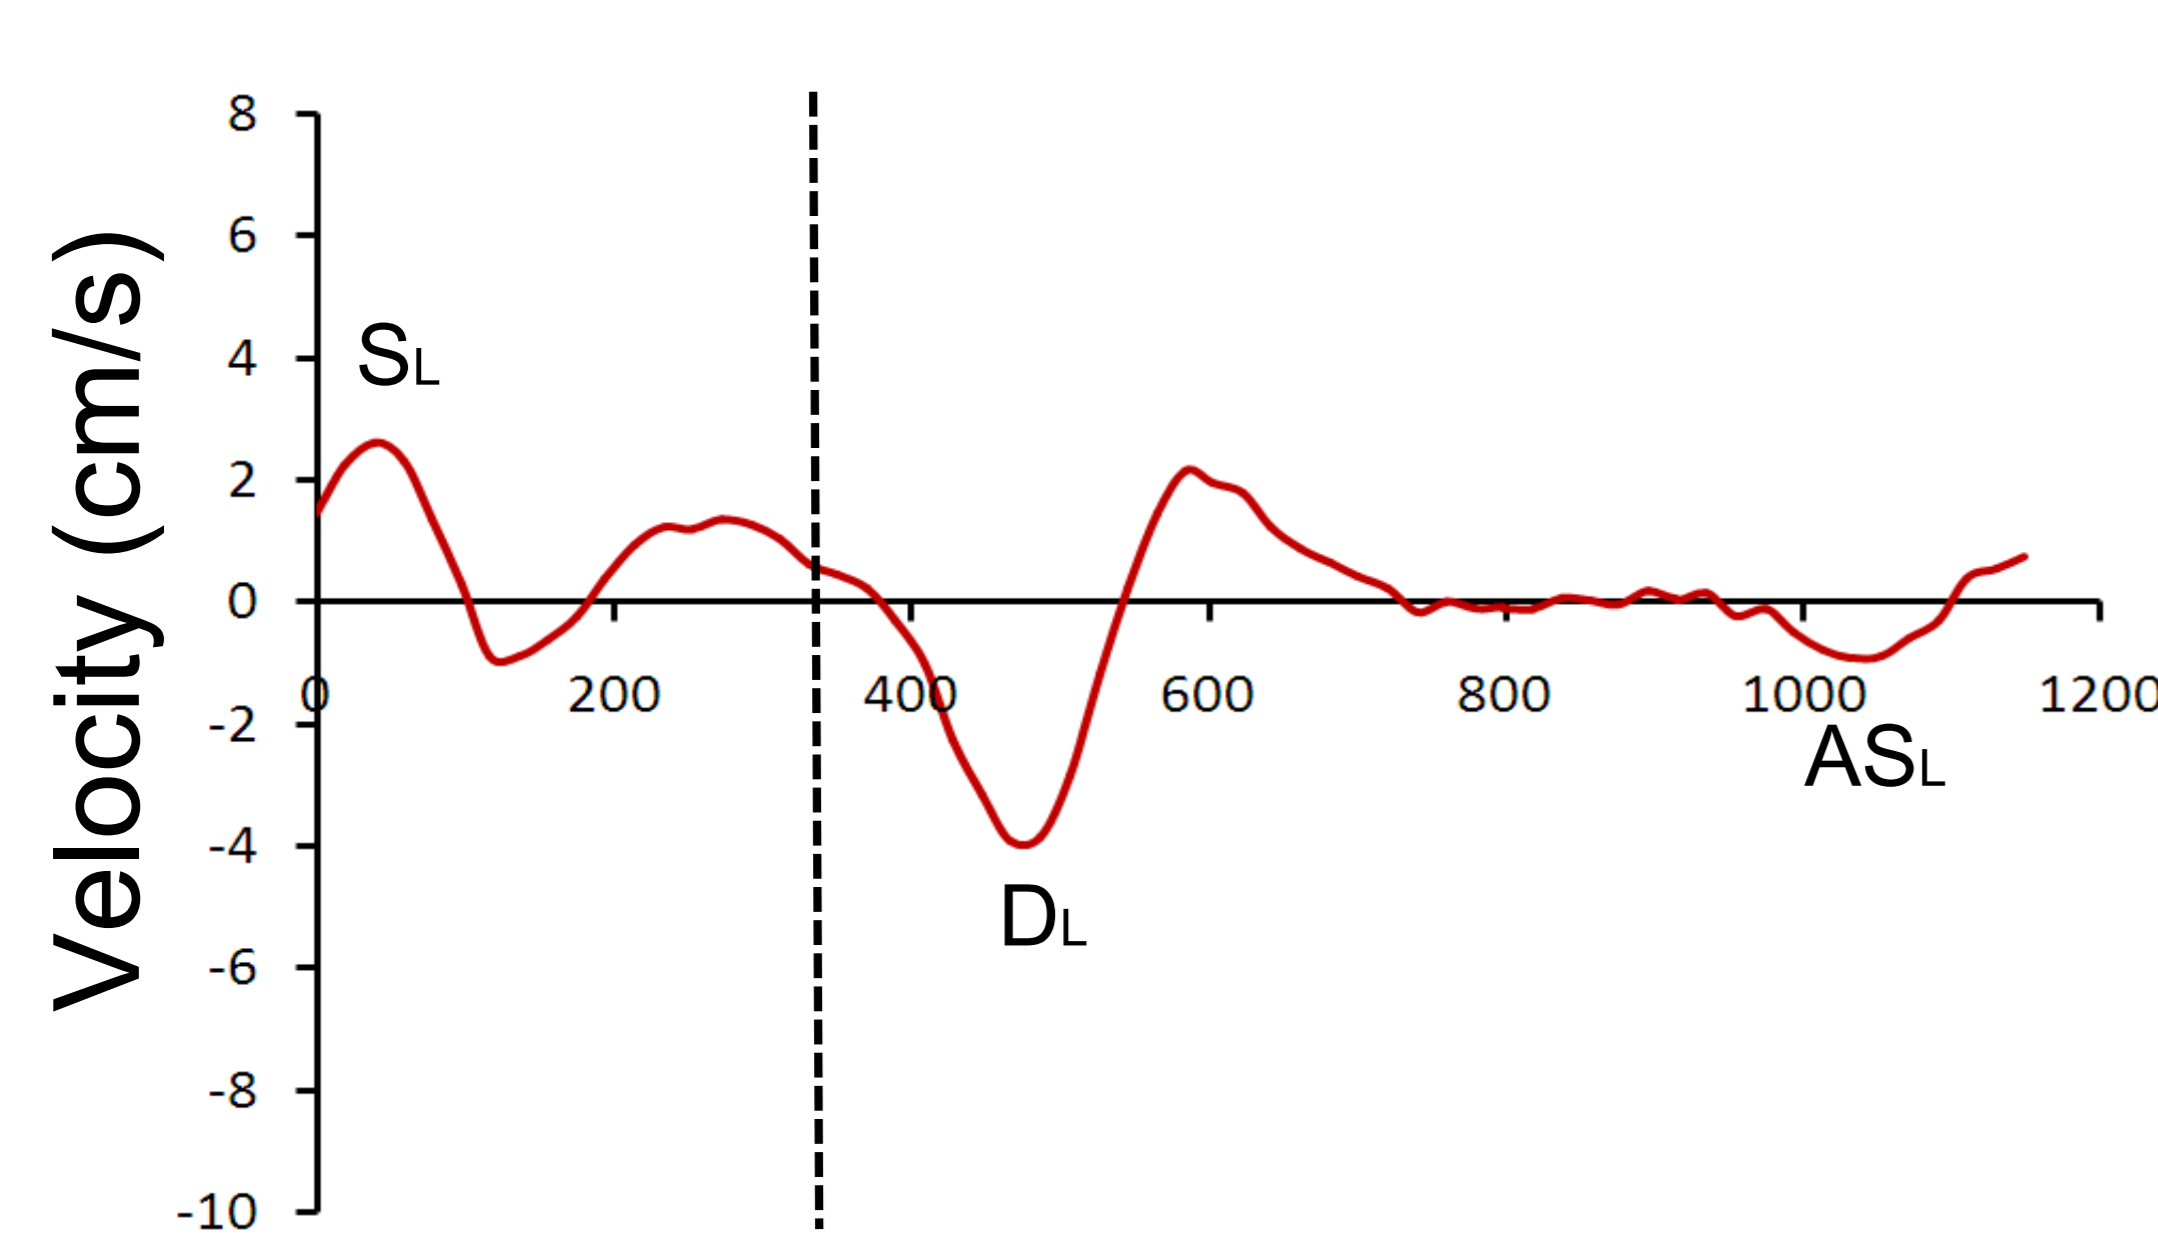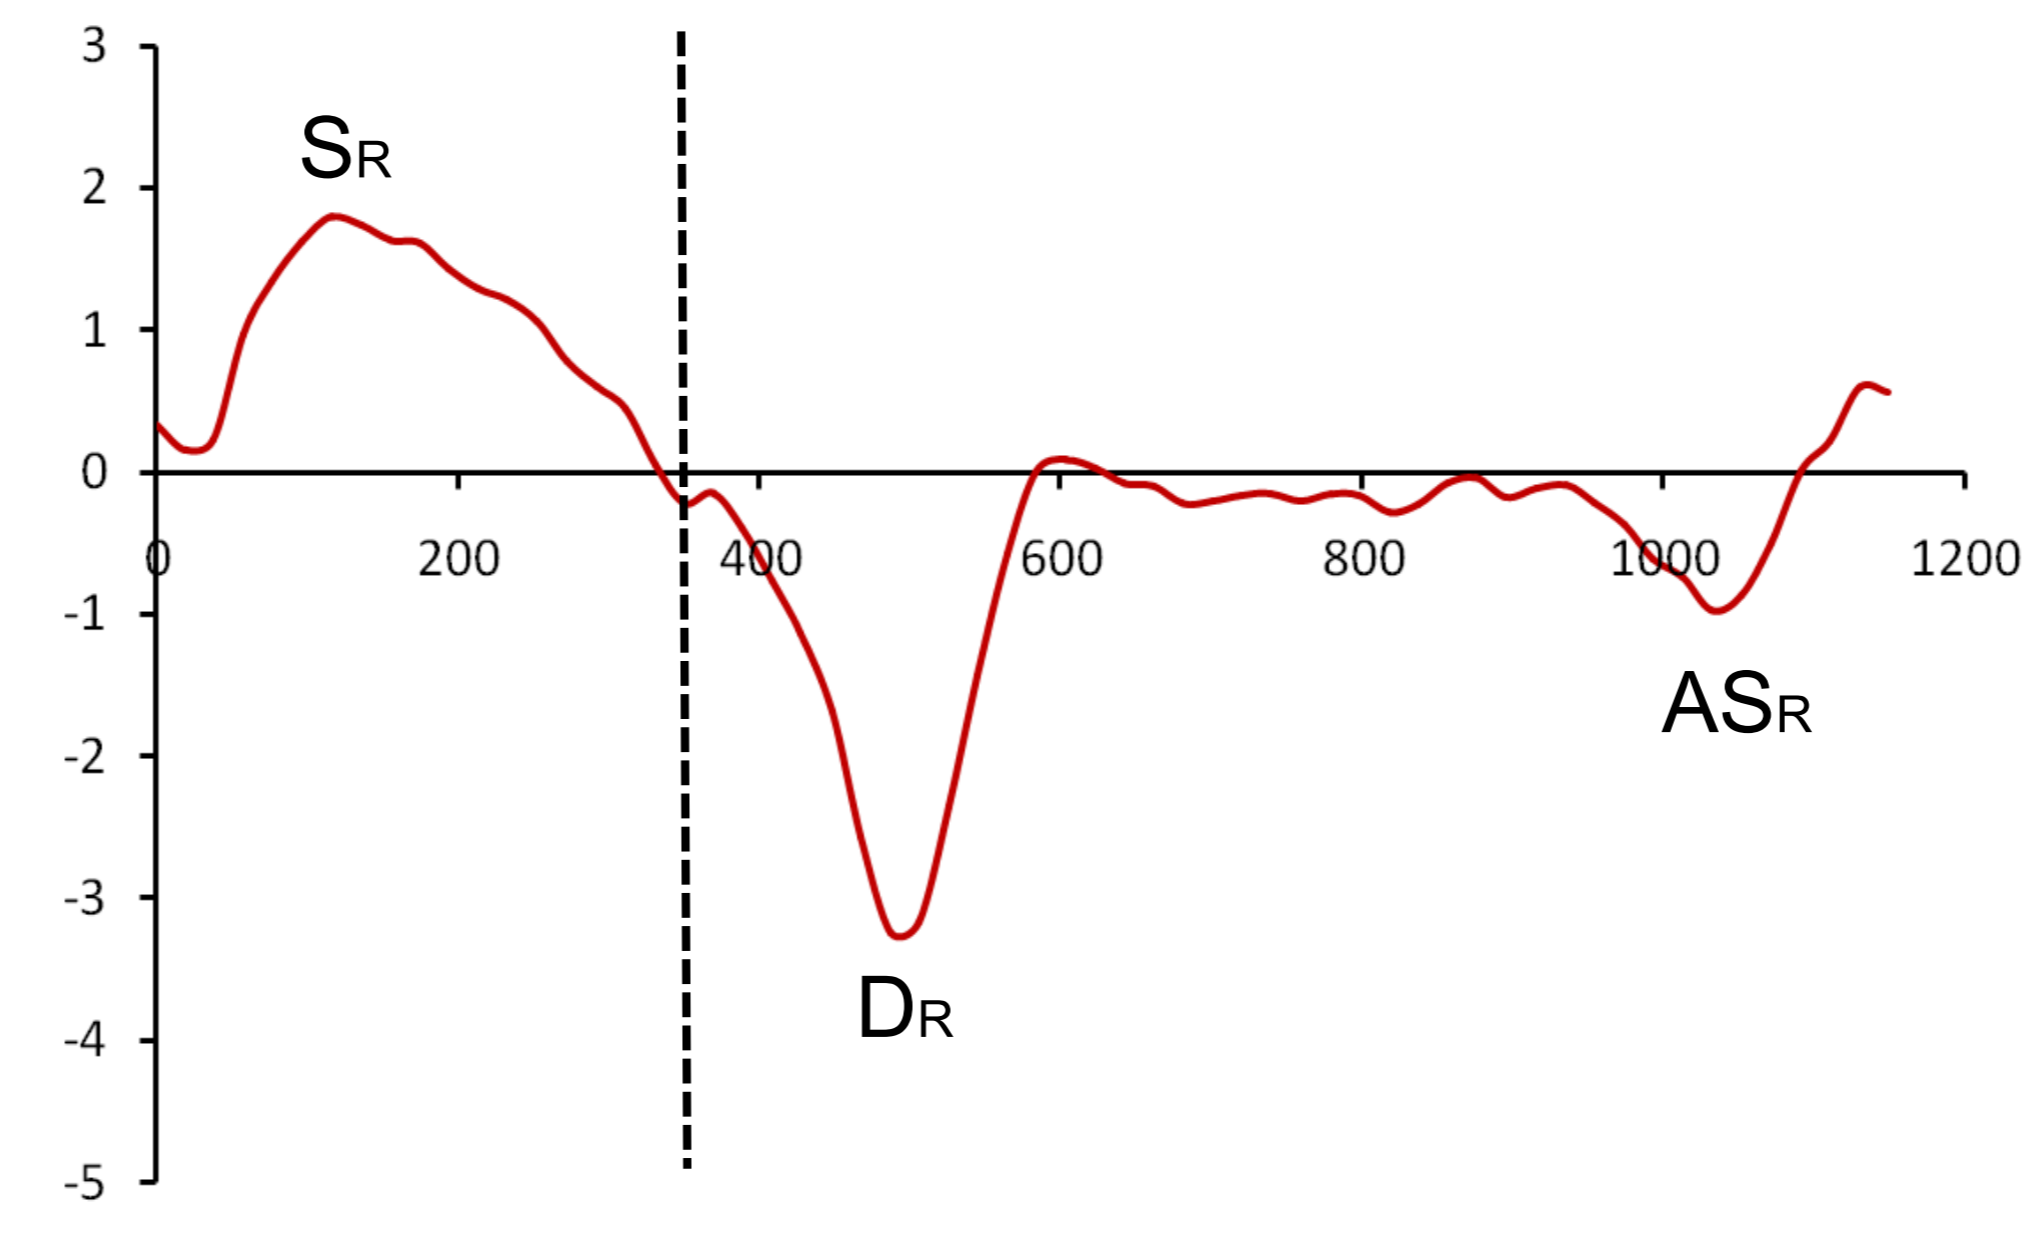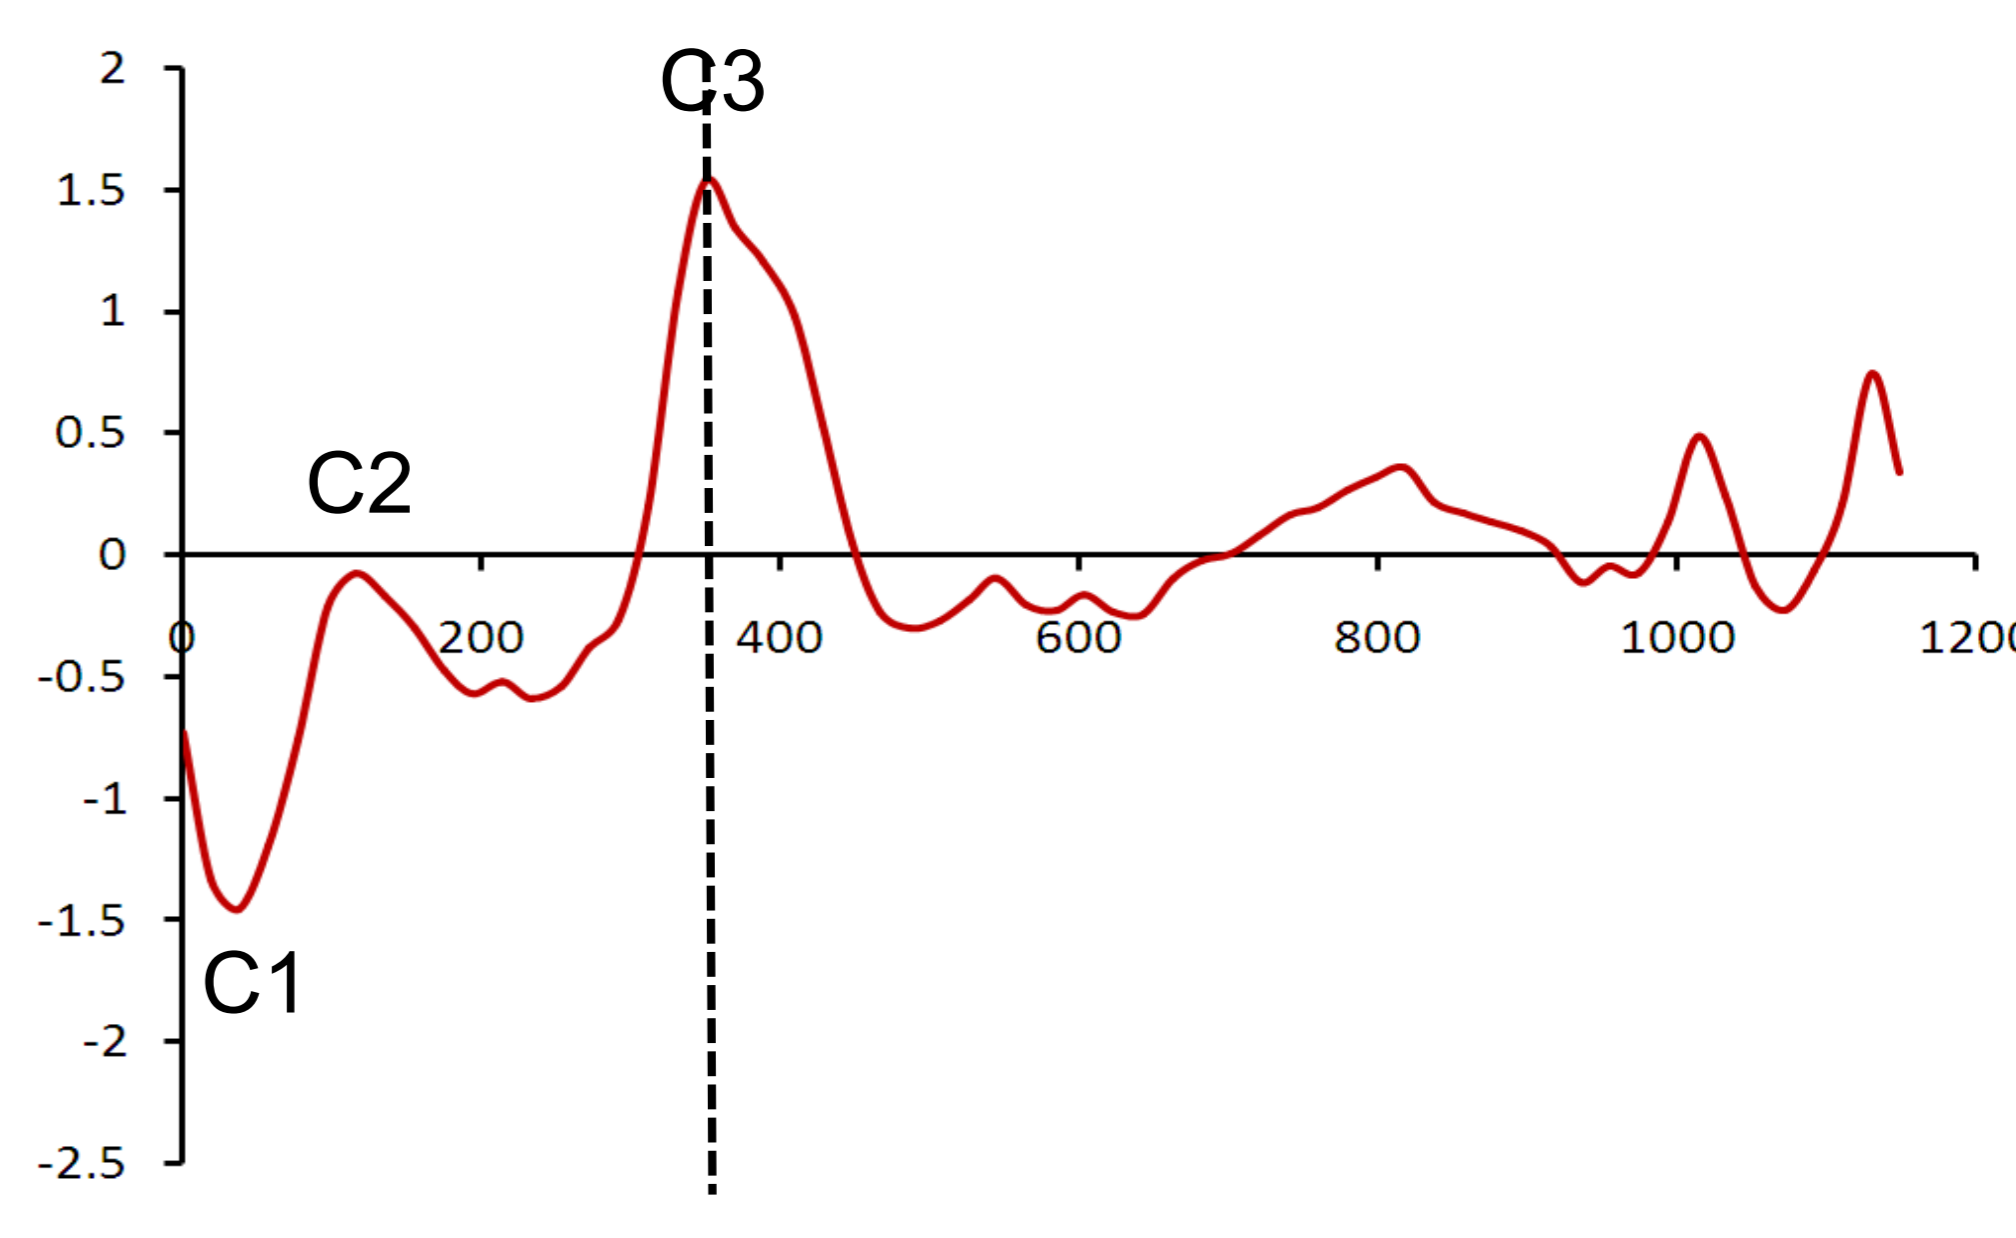

Supplement: MOESM1 [file 9583552]
